# Supplementary material for: One Year of Alendronate after One Year of Parathyroid Hormone (1–84) for Osteoporosis
Source: Atypon-hosted journal article supplement (doi:10.1056/nejmoa050336), 2005-08-10
Supplement: nejm_black_555sa1.pdf [file nejm_black_555sa1.pdf]

## Supplementary Appendix

This appendix has been provided by the authors to give readers additional information about their work.

Supplement to: Black DM, Bilezikian JP, Ensrud KE, et al. One year of alendronate after one year of parathyroid hormone (1-84) for osteoporosis. *N Engl J Med* 2005;353:555-65.

Web Supplementary Table 2a: 0-24 Month Changes

| BMD site                 | Treatment   | Mean % change | Comparison to PTH/ALN |         | Comparison to PTH-ALN/ALN |         |
|--------------------------|-------------|---------------|-----------------------|---------|---------------------------|---------|
|                          |             |               | % difference          | p-value | % difference              | p value |
| DXA spine                | PTH-PBO     | 4.1           | -8.0                  | <.0001  | -3.8                      | 0.0017  |
|                          | PTH-ALN     | 12.1          | --                    |         | 4.1                       | 0.0006  |
|                          | PTH/ALN-ALN | 7.9           | -4.1                  | 0.0006  | --                        |         |
|                          | ALN-ALN     | 7.7           | -4.4                  | 0.0003  | -0.2                      | 0.84    |
| DXA total hip            | PTH-PBO     | -0.1          | -4.6                  | <.0001  | -3.3                      | 0.0002  |
|                          | PTH-ALN     | 4.5           | --                    |         | 1.3                       | 0.15    |
|                          | PTH/ALN-ALN | 3.2           | -1.3                  | 0.15    | --                        |         |
|                          | ALN-ALN     | 3.3           | -1.2                  | 0.17    | 0.1                       | 0.95    |
| DXA femoral neck         | PTH-PBO     | 1.2           | -3.1                  | 0.005   | -1.8                      | 0.1     |
|                          | PTH-ALN     | 4.3           | --                    |         | 1.3                       | 0.23    |
|                          | PTH/ALN-ALN | 3             | -1.3                  | 0.23    | --                        |         |
|                          | ALN-ALN     | 3.2           | -1.1                  | 0.3     | 0.2                       | 0.86    |
| DXA radius (1/3)         | PTH-PBO     | -3.7          | -1.6                  | 0.04    | -3.1                      | <.0001  |
|                          | PTH-ALN     | -2.1          | --                    |         | -1.5                      | 0.052   |
|                          | PTH/ALN-ALN | -0.8          | 1.5                   | 0.052   | --                        |         |
|                          | ALN-ALN     | 0.03          | 2.1                   | 0.005   | 0.6                       | 0.4     |
| DXA Total Body           | PTH-PBO     | 1             | 0.1                   | 0.91    | -1.1                      | 0.21    |
|                          | PTH-ALN     | 0.9           | --                    |         | -1.2                      | 0.16    |
|                          | PTH/ALN-ALN | 2             | 1.2                   | 0.16    | --                        |         |
|                          | ALN-ALN     | 1.3           | 0.4                   | 0.61    | -0.7                      | 0.37    |
| QCT trabecular spine BMD | PTH-PBO     | 14            | -16.6                 | 0.0004  | 2.7                       | 0.55    |
|                          | PTH-ALN     | 30.5          | --                    |         | 19.3                      | <.0001  |
|                          | PTH/ALN-ALN | 11.2          | -19.3                 | <.0001  | --                        |         |
|                          | ALN-ALN     | 6.1           | -24.4                 | <.0001  | -5.1                      | 0.26    |
| QCT trabecular hip BMD   | PTH-PBO     | 4.5           | -8.1                  | 0.03    | -8.2                      | 0.09    |
|                          | PTH-ALN     | 12.6          | --                    |         | 2.0                       | 0.59    |
|                          | PTH/ALN-ALN | 10.7          | -2.0                  | 0.59    | --                        |         |
|                          | ALN-ALN     | 4.4           | -8.2                  | 0.02    | -6.2                      | 0.09    |
| QCT trabecular hip BMC   | PTH-PBO     | 4.3           | -8.8                  | 0.09    | -13.9                     | 0.008   |
|                          | PTH-ALN     | 13.1          | --                    |         | -5.1                      | 0.31    |
|                          | PTH/ALN-ALN | 18.3          | 5.1                   | 0.31    | --                        |         |
|                          | ALN-ALN     | 6.8           | -6.3                  | 0.21    | -11.5                     | 0.03    |
| QCT cortical hip BMD     | PTH-PBO     | -2.9          | -0.3                  | 0.75    | -1.6                      | 0.13    |
|                          | PTH-ALN     | -2.5          | --                    |         | -1.3                      | 0.23    |
|                          | PTH/ALN-ALN | -1.3          | 1.3                   | 0.23    | --                        |         |
|                          | ALN-ALN     | -1.7          | 0.8                   | 0.45    | -0.5                      | 0.65    |
| QCT cortical hip BMC     | PTH-PBO     | -1.4          | -4.8                  | 0.16    | -7.2                      | 0.04    |
|                          | PTH-ALN     | 3.4           | --                    |         | -2.4                      | 0.48    |
|                          | PTH/ALN-ALN | 5.8           | 2.4                   | 0.48    | --                        |         |
|                          | ALN-ALN     | 4.4           | 1.1                   | 0.76    | -1.4                      | 0.69    |
| QCT cortical hip volume  | PTH-PBO     | 1.1           | -4.8                  | 0.1     | -5.7                      | 0.054   |
|                          | PTH-ALN     | 5.9           | --                    |         | -1.0                      | 0.74    |
|                          | PTH/ALN-ALN | 6.9           | 1.0                   | 0.74    | --                        |         |
|                          | ALN-ALN     | 6.2           | 0.3                   | 0.91    | -0.7                      | 0.82    |

Web Supplementary Table 2b: 12-24 Month Changes

| BMD site                 | Treatment   | Mean % change | Comparison to PTH/ALN |         | Comparison to PTH-ALN/ALN |         |
|--------------------------|-------------|---------------|-----------------------|---------|---------------------------|---------|
|                          |             |               | % difference          | p-value | % difference              | p value |
| DXA spine                | PTH-PBO     | -1.7          | -6.6                  | <.0001  | -3.4                      | <.0001  |
|                          | PTH-ALN     | 4.9           | --                    |         | 3.3                       | <.0001  |
|                          | PTH/ALN-ALN | 1.6           | -3.3                  | <.0001  | --                        |         |
|                          | ALN-ALN     | 2.8           | -2.1                  | 0.0016  | 1.2                       | 0.07    |
| DXA total hip            | PTH-PBO     | 0.03          | -3.6                  | <.0001  | -1.2                      | 0.06    |
|                          | PTH-ALN     | 3.6           | --                    |         | 2.4                       | 0.0006  |
|                          | PTH/ALN-ALN | 1.2           | -2.4                  | 0.0005  | --                        |         |
|                          | ALN-ALN     | 0.3           | -3.4                  | <.0001  | -1.0                      | 0.16    |
| DXA femoral neck         | PTH-PBO     | 0.6           | -3.0                  | 0.0005  | -0.7                      | 0.46    |
|                          | PTH-ALN     | 3.6           | --                    |         | 2.4                       | 0.007   |
|                          | PTH/ALN-ALN | 1.2           | -2.4                  | 0.007   | --                        |         |
|                          | ALN-ALN     | 0.9           | -2.7                  | 0.002   | -0.4                      | 0.67    |
| DXA radius (1/3)         | PTH-PBO     | 0.2           | -0.7                  | 0.27    | -0.5                      | 0.42    |
|                          | PTH-ALN     | 0.8           | --                    |         | 0.2                       | 0.76    |
|                          | PTH/ALN-ALN | 0.6           | -0.2                  | 0.76    | --                        |         |
|                          | ALN-ALN     | 0.7           | -0.1                  | 0.9     | 0.1                       | 0.86    |
| DXA Total Body           | PTH-PBO     | 2.6           | 0.7                   | 0.64    | 2.7                       | 0.02    |
|                          | PTH-ALN     | 1.9           | --                    |         | 2.0                       | 0.06    |
|                          | PTH/ALN-ALN | -0.1          | -2.0                  | 0.06    | --                        |         |
|                          | ALN-ALN     | -0.8          | -2.7                  | 0.02    | -0.7                      | 0.66    |
| QCT trabecular spine BMD | PTH-PBO     | -9.8          | -13.3                 | <.0001  | -7.6                      | 0.003   |
|                          | PTH-ALN     | 3.4           | --                    |         | 5.7                       | 0.03    |
|                          | PTH/ALN-ALN | -2.2          | -5.7                  | 0.03    | --                        |         |
|                          | ALN-ALN     | -0.9          | -4.3                  | 0.09    | 1.4                       | 0.69    |
| QCT trabecular hip BMD   | PTH-PBO     | -4.2          | -10.1                 | 0.006   | -9.2                      | 0.01    |
|                          | PTH-ALN     | 5.9           | --                    |         | 0.9                       | 0.79    |
|                          | PTH/ALN-ALN | 5             | -0.9                  | 0.79    | --                        |         |
|                          | ALN-ALN     | 1.2           | -4.8                  | 0.17    | -3.8                      | 0.26    |
| QCT trabecular hip BMC   | PTH-PBO     | -1.9          | -11.1                 | 0.02    | -9.2                      | 0.06    |
|                          | PTH-ALN     | 9.1           | --                    |         | 1.8                       | 0.7     |
|                          | PTH/ALN-ALN | 7.3           | -1.8                  | 0.7     | --                        |         |
|                          | ALN-ALN     | 2.9           | -6.2                  | 0.2     | -4.4                      | 0.37    |
| QCT cortical hip BMD     | PTH-PBO     | -1.4          | -1.5                  | 0.13    | -0.8                      | 0.42    |
|                          | PTH-ALN     | 0.1           | --                    |         | 0.7                       | 0.49    |
|                          | PTH/ALN-ALN | -0.6          | -0.7                  | 0.49    | --                        |         |
|                          | ALN-ALN     | -1.9          | -2.0                  | 0.04    | -1.3                      | 0.16    |
| QCT cortical hip BMC     | PTH-PBO     | -0.8          | -5.4                  | 0.09    | -2.2                      | 0.49    |
|                          | PTH-ALN     | 4.6           | --                    |         | 3.2                       | 0.3     |
|                          | PTH/ALN-ALN | 1.4           | -3.2                  | 0.3     | --                        |         |
|                          | ALN-ALN     | 1.2           | -3.3                  | 0.26    | -0.2                      | 0.96    |
| QCT cortical hip volume  | PTH-PBO     | 0.4           | -4.0                  | 0.16    | -1.5                      | 0.69    |
|                          | PTH-ALN     | 4.4           | --                    |         | 2.5                       | 0.37    |
|                          | PTH/ALN-ALN | 1.9           | -2.5                  | 0.37    | --                        |         |
|                          | ALN-ALN     | 3.1           | -1.3                  | 0.63    | 1.1                       | 0.66    |

Web Supplementary Table 2c: 0-12 Month Changes

| BMD site                 | Treatment   | Mean % change | Comparison to PTH/ALN |         | Comparison to PTH/ALN/ALN |         |
|--------------------------|-------------|---------------|-----------------------|---------|---------------------------|---------|
|                          |             |               | % difference          | p-value | % difference              | p-value |
| DXA spine                | PTH-PBO     | 5.8           | -0.9                  | 0.41    | -0.4                      | 0.72    |
|                          | PTH-ALN     | 6.7           | --                    |         | 0.5                       | 0.63    |
|                          | PTH/ALN-ALN | 6.2           | -0.5                  | 0.63    | --                        |         |
|                          | ALN-ALN     | 4.7           | -2.0                  | 0.06    | -1.5                      | 0.16    |
| DXA total hip            | PTH-PBO     | -0.1          | -0.9                  | 0.26    | -2.1                      | 0.008   |
|                          | PTH-ALN     | 0.8           | --                    |         | -1.2                      | 0.13    |
|                          | PTH/ALN-ALN | 2             | 1.2                   | 0.13    | --                        |         |
|                          | ALN-ALN     | 3             | 2.2                   | 0.005   | 1.0                       | 0.18    |
| DXA femoral neck         | PTH-PBO     | 0.9           | 0.1                   | 0.67    | -0.9                      | 0.29    |
|                          | PTH-ALN     | 0.7           | --                    |         | -1.0                      | 0.21    |
|                          | PTH/ALN-ALN | 1.8           | 1.0                   | 0.21    | --                        |         |
|                          | ALN-ALN     | 2.3           | 1.6                   | 0.06    | 0.5                       | 0.51    |
| DXA radius (1/3)         | PTH-PBO     | -3.9          | -1.0                  | 0.13    | -2.7                      | <0.001  |
|                          | PTH-ALN     | -2.9          | --                    |         | -1.7                      | 0.01    |
|                          | PTH/ALN-ALN | -1.2          | 1.7                   | 0.01    | --                        |         |
|                          | ALN-ALN     | -0.7          | 2.2                   | 0.001   | 0.5                       | 0.46    |
| DXA Total Body           | PTH-PBO     | -1.5          | -0.6                  | 0.51    | -3.7                      | <0.001  |
|                          | PTH-ALN     | -0.9          | --                    |         | -3.1                      | 0.0007  |
|                          | PTH/ALN-ALN | 2.3           | 3.1                   | 0.0007  | --                        |         |
|                          | ALN-ALN     | 2.4           | 3.2                   | 0.0005  | 0.1                       | 0.91    |
| QCT trabecular spine BMD | PTH-PBO     | 29.8          | 0.6                   | 0.9     | 15.1                      | 0.002   |
|                          | PTH-ALN     | 29.2          | --                    |         | 15.4                      | 0.002   |
|                          | PTH/ALN-ALN | 13.7          | -15.4                 | 0.002   | --                        |         |
|                          | ALN-ALN     | 7.7           | -21.5                 | <0.001  | -6.0                      | 0.22    |
| QCT trabecular hip BMD   | PTH-PBO     | 9.1           | 1.0                   | 0.77    | 1.9                       | 0.58    |
|                          | PTH-ALN     | 8.1           | --                    |         | 0.9                       | 0.79    |
|                          | PTH/ALN-ALN | 7.2           | -0.9                  | 0.79    | --                        |         |
|                          | ALN-ALN     | 2.2           | -5.9                  | 0.08    | -5.0                      | 0.15    |
| QCT trabecular hip BMC   | PTH-PBO     | 7.5           | 1.6                   | 0.7     | -4.5                      | 0.34    |
|                          | PTH-ALN     | 5.7           | --                    |         | -6.3                      | 0.17    |
|                          | PTH/ALN-ALN | 12            | 6.3                   | 0.17    | --                        |         |
|                          | ALN-ALN     | 4.1           | -1.6                  | 0.72    | -7.9                      | 0.09    |
| QCT cortical hip BMD     | PTH-PBO     | -1.4          | 1.2                   | 0.09    | -0.5                      | 0.47    |
|                          | PTH-ALN     | -2.6          | --                    |         | -1.7                      | 0.02    |
|                          | PTH/ALN-ALN | -0.9          | 1.7                   | 0.02    | --                        |         |
|                          | ALN-ALN     | 0.3           | 2.9                   | <0.001  | 1.2                       | 0.09    |
| QCT cortical hip BMC     | PTH-PBO     | 0.1           | 1.3                   | 0.66    | -4.1                      | 0.18    |
|                          | PTH-ALN     | -1.2          | --                    |         | -5.5                      | 0.07    |
|                          | PTH/ALN-ALN | 4.3           | 5.5                   | 0.07    | --                        |         |
|                          | ALN-ALN     | 4.3           | 5.5                   | 0.07    | 0.03                      | 0.99    |
| QCT cortical hip volume  | PTH-PBO     | 1.6           | 0.3                   | 0.93    | -3.4                      | 0.22    |
|                          | PTH-ALN     | 1.3           | --                    |         | -3.7                      | 0.18    |
|                          | PTH/ALN-ALN | 5             | 3.7                   | 0.18    | --                        |         |
|                          | ALN-ALN     | 3.9           | 2.6                   | 0.33    | -1.1                      | 0.7     |
